# Supplementary material for: Changing educational inequalities in sporting inactivity among adults in Germany: a trend study from 2003 to 2012
Source: Springer Nature journal article supplement (doi:10.1186/s12889-017-4478-2), 2017-06-06
Supplement: MOESM1 [file 12342522]

**Additional file 1: Table S1.** Key survey metrics (response rates, sample efficiencies and deviations of the sample characteristics from the target population)

|                                | 2003        |                           |      | 2009        |                           |       | 2010        |                           |       | 2012        |                           |       |
|--------------------------------|-------------|---------------------------|------|-------------|---------------------------|-------|-------------|---------------------------|-------|-------------|---------------------------|-------|
|                                | Sample<br>% | Germany <sup>a</sup><br>% | Diff | Sample<br>% | Germany <sup>a</sup><br>% | Diff  | Sample<br>% | Germany <sup>a</sup><br>% | Diff  | Sample<br>% | Germany <sup>a</sup><br>% | Diff  |
| Sex                            |             |                           |      |             |                           |       |             |                           |       |             |                           |       |
| Men                            | 46.8        | 50.3                      | -3.5 | 42.2        | 50.2                      | -8.0  | 42.8        | 50.2                      | -7.5  | 49.5        | 50.3                      | -0.8  |
| Women                          | 53.2        | 49.7                      | +3.5 | 57.8        | 49.8                      | +8.0  | 57.2        | 49.8                      | +7.5  | 50.5        | 49.7                      | +0.8  |
| Age group                      |             |                           |      |             |                           |       |             |                           |       |             |                           |       |
| 25–39 years                    | 32.5        | 35.4                      | -2.9 | 29.0        | 31.3                      | -2.3  | 29.3        | 30.7                      | -1.5  | 23.0        | 30.0                      | -7.0  |
| 40–49 years                    | 30.1        | 24.9                      | +5.2 | 30.0        | 27.6                      | +2.4  | 29.1        | 27.9                      | +1.2  | 26.7        | 27.5                      | -0.8  |
| 50–59 years                    | 19.8        | 19.4                      | +0.4 | 22.6        | 22.0                      | +0.6  | 22.9        | 22.6                      | +0.3  | 26.1        | 24.4                      | +1.7  |
| 60–69 years                    | 17.7        | 20.3                      | -2.6 | 18.5        | 19.1                      | -0.7  | 18.7        | 18.8                      | -0.1  | 24.2        | 18.2                      | +6.0  |
| Education                      |             |                           |      |             |                           |       |             |                           |       |             |                           |       |
| Low                            | 29.2        | 37.5                      | -8.3 | 21.9        | 33.5                      | -11.7 | 21.4        | 33.1                      | -11.8 | 17.5        | 28.6                      | -11.1 |
| Medium                         | 47.4        | 47.0                      | +0.4 | 49.5        | 50.1                      | -0.6  | 48.0        | 49.1                      | -1.1  | 49.9        | 51.3                      | -1.4  |
| High                           | 23.4        | 15.6                      | +7.8 | 28.7        | 16.4                      | +12.3 | 31.7        | 17.8                      | +12.9 | 32.6        | 20.1                      | +12.5 |
| Response rate <sup>b</sup>     |             | – <sup>c</sup>            |      |             | 29.1%                     |       |             | 28.9%                     |       |             | 22.1%                     |       |
| Sample efficiency <sup>d</sup> |             | 67.4%                     |      |             | 57.7%                     |       |             | 58.0%                     |       |             | 58.8% <sup>e</sup>        |       |

Diff = Difference between sample and target population (Germany)

<sup>a</sup> extrapolated based on official data from the German Federal Statistical Office

<sup>b</sup> “Response Rate 3” of the American Association for Public Opinion Research (AAPOR): Standard Definitions - Final Dispositions of Case Codes and Outcome Rates for Surveys. AAPOR; 2008.

<sup>c</sup> cannot be retrospectively calculated according to the 2008 version of the AAPOR Standard Definitions; the response rate reported earlier for 2003 is therefore not comparable with those for 2009–2012

<sup>d</sup> the sample efficiency rate represents the sample bias according to sex, age, education and region (higher efficiency means lower sample bias)

<sup>e</sup> the 2012 sample was regionally stratified, the rate represents the mean efficiency over sample strata
